# Supplementary material
Source: PubMed Central journal article supplement (PMC6385749)
Supplement: DB180955SupplementaryData.pdf [file DB180955SupplementaryData.pdf]

SUPPLEMENTARY DATA

**Supplementary Figure S1. Levels of TGFβ ligands and IL-6 in CM correlated with its ability to suppress adipogenesis.**

CM samples were obtained from cultures of Om and Abdsc ASCs and levels of activin A, active TGFβ, and IL-6 in the CM samples and their ability to suppress adipogenesis of Abdsc ASCs were assessed (Fig. 2). Correlations between the amount of (A) activin A, (B) active TGFβ and (C) IL-6 within the Om and Abdsc CM samples and their ability to suppress adipogenesis (% suppression) are plotted. Correlations between (D) active TGFβ and activin A, (E) active TGFβ and IL-6 and (F) activin A and IL-6 levels in the CM samples are plotted. Pearson correlation coefficients (r), p values, and number of samples from different subjects are shown in each figure.

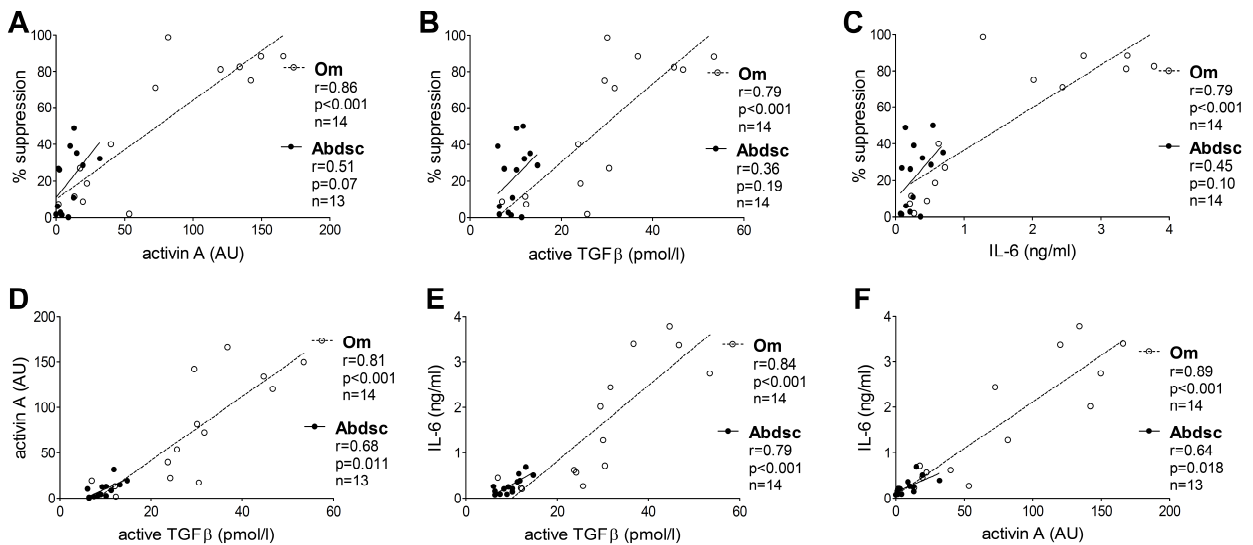

**Supplementary Figure S2. IL-6 did not suppress adipogenesis in human Abdsc ASCs.**

Abdsc ASCs were differentiated in the control condition or with additions of IL-6, TGFβ1, or TNFα during the 7d-induction period and differentiation (Diff.) degree was assessed (TAG content) on d14. \* $p<0.05$  compared to the control, Dunnett's test,  $n=4$  independent samples.

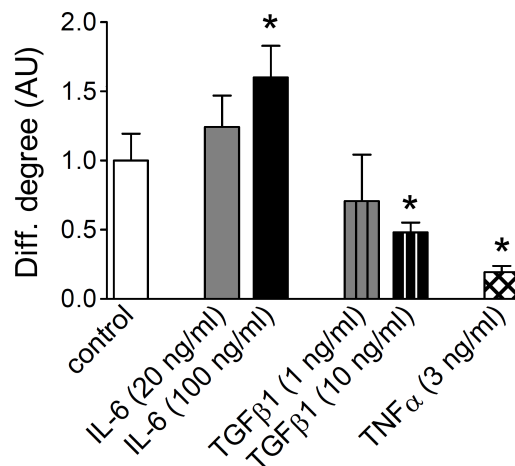

SUPPLEMENTARY DATA

**Supplementary Figure S3. Inhibition of TGFβ signaling completely blocked the anti-adipogenic effects of Om ASC CM.**

(A) After a 15 min-preincubation with (+) or without (-) SB431542 (SB, 5 μM), a TGFBR1 kinase inhibitor, Abdsc ASCs were treated with Om ASC CM for additional 30 min and phospho and total SMAD2 levels were measured with immunoblotting. A representative Western image and quantification of phospho to total SMAD2 are presented. (B) Abdsc ASCs were differentiated with combinations of SB (5 μM) and Om ASC CM and Diff. degree (ATGL protein levels) were assessed on d14. \*SB and #CM effects were determined by two-way ANOVA followed by paired t-tests, p<0.05, n=7 (A) and 5 (B).

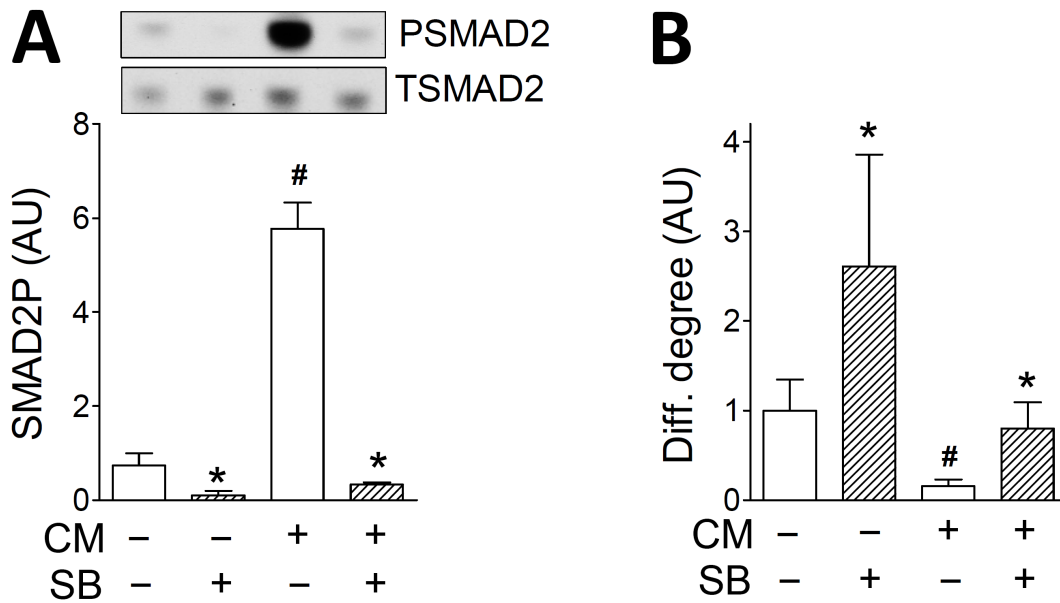

SUPPLEMENTARY DATA

**Supplementary Table S1. Characteristics of subjects**

| #  | Age | Sex | BMI  | Race | HbA1c | BGR | Medications that Affect Metabolism                        | Relevant Medical Conditions                    |
|----|-----|-----|------|------|-------|-----|-----------------------------------------------------------|------------------------------------------------|
| 1  | 35  | F   | 25.0 | AA   | N/A   | 124 |                                                           |                                                |
| 2  | 37  | M   | 55.0 | AA   | 7.0   | 107 | Toprol XL                                                 |                                                |
| 3  | 41  | F   | 54.0 | H    | 9.1   | 103 |                                                           | T2D                                            |
| 4  | 20  | F   | 54.0 | H    | 6     | 101 |                                                           |                                                |
| 5  | 46  | F   | 27.0 | H    | N/A   | 84  |                                                           |                                                |
| 6  | 47  | F   | 51.0 | AA   | 6.1   | N/A | Simvastatin                                               | Morbid obesity,<br>Hypercholesterolemia        |
| 7  | 39  | F   | 31.0 | H    | N/A   | N/A |                                                           |                                                |
| 8  | 31  | F   | 29.0 | H    | N/A   | 87  | Levonorgestrel,<br>Estradiol                              |                                                |
| 9  | 48  | F   | 23.0 | H    | N/A   |     | Simvastatin, Provera,                                     |                                                |
| 10 | 31  | M   | 63.0 | H    | 6.0   | 139 |                                                           | Hypercholesterolemia                           |
| 11 | 50  | M   | 42.0 | C    | N/A   | N/A | Simvastatin                                               |                                                |
| 12 | 56  | F   | 39.0 | C    | 6.0   | 130 |                                                           | Lipoprotein disorder,<br>Hypercholesterolemia. |
| 13 | 48  | F   | 54.0 | AA   | N/A   | 89  | Atenolol                                                  | Fatty liver                                    |
| 14 | 50  | F   | 39.0 | C    | 6.1   | 105 | Nicotine Patch                                            |                                                |
| 15 | 45  | F   | 38.0 | C    | 5.8   | 131 |                                                           |                                                |
| 16 | 43  | F   | 41.0 | H    | 5.9   | 107 |                                                           |                                                |
| 17 | 50  | M   | 43.0 | C    | N/A   | N/A | Simvastatin                                               | Hypercholesterolemia                           |
| 18 | 24  | F   | 46.0 | AA   | 5.1   | 88  |                                                           |                                                |
| 19 | 20  | M   | 54.0 | C    | 5.5   | 101 |                                                           |                                                |
| 20 | 20  | F   | 54.0 | H    | 5.7   | 101 |                                                           |                                                |
| 21 | 35  | F   | 40.0 | C    | 6.3   | 112 |                                                           |                                                |
| 22 | 36  | F   | 43.0 | AA   | 6     | 98  |                                                           |                                                |
| 23 | 58  | F   | 56.0 | AA   | 6.5   | N/A |                                                           | T2D                                            |
| 24 | 23  | F   | 43.4 | C    | 5.8   | 84  |                                                           |                                                |
| 25 | 37  | F   | 38.0 | H    | 5.5   | 77  | Phentermine                                               | OSA                                            |
| 26 | 21  | F   | 44.1 | H    | 5.2   | 82  |                                                           |                                                |
| 27 | 64  | M   | 39.3 | C    | 10.4  | 206 | Atenolol, Avapro,<br>Lantus, Humalog,<br>Lipitor, Niaspan | T2D                                            |
| 28 | 44  | F   | 37.5 | C    | 5.8   | 88  |                                                           |                                                |
| 29 | 35  | M   | 40.4 | C    | 7.2   | 102 | Glipizide                                                 | T2D, OSA                                       |
| 30 | 30  | F   | 44.4 | H    | 5.8   | 84  |                                                           |                                                |
| 31 | 33  | M   | 46.3 | C    | 5.6   | 85  |                                                           |                                                |
| 32 | 60  | M   | 38.3 | C    | 5.8   | 91  |                                                           | OSA                                            |
| 33 | 42  | F   | 41.6 | H    | 6.4   | 96  | Cozaar                                                    |                                                |
| 34 | 29  | F   | 38.3 | H    | 4.9   | 89  | Metoprolol                                                |                                                |
| 35 | 33  | M   | 50.0 | H    | 6.3   | 81  |                                                           | OSA                                            |
| 36 | 20  | M   | 40.2 | AA   | 5.4   | 102 |                                                           |                                                |
| 37 | 51  | F   | 39.5 | C    | 5.5   | 87  |                                                           |                                                |
| 38 | 26  | F   | 44.9 | AA   | 5.3   | 89  |                                                           |                                                |
| 39 | 40  | F   | 46.1 | AA   | 6.4   | 100 |                                                           |                                                |
| 40 | 45  | F   | 41.8 | AA   | 5.7   | 93  |                                                           |                                                |
| 41 | 59  | F   | 40.3 | C    | 5.6   | 117 |                                                           |                                                |
| 42 | 52  | F   | 39.0 | C    | 5.9   | 89  |                                                           | OSA                                            |
| 43 | 36  | F   | 38.0 | C    | 5.7   | 92  |                                                           | OSA                                            |
| 44 | 43  | F   | 39.1 | H    | 6     | 101 |                                                           |                                                |
| 45 | 47  | F   | 39.1 | AA   | 10.1  | 181 | Metformin, Glipizide,                                     | Hyperlipidemia, T2D                            |
| 46 | 32  | F   | 27.6 | N/A  | 5.3   | 95  | Metformin                                                 | PCOS                                           |
| 47 | 31  | F   | 43.8 | C    | 6.3   | 88  |                                                           |                                                |
| 48 | 27  | F   | 48.8 | AA   | 5.5   | 95  |                                                           |                                                |

SUPPLEMENTARY DATA

|    |    |   |      |    |     |     |               |
|----|----|---|------|----|-----|-----|---------------|
| 49 | 51 | F | 26.2 | C  | 5.6 | 71  |               |
| 50 | 41 | F | 38.9 | AA | 6.3 | 123 | Hyperglycemia |
| 51 | 28 | F | 27.7 | AA | 5.3 | 74  | Progesterone  |

AA, African American; C, Caucasian; H, Hispanic; HbA1c, Hemoglobin A1c; RBG, Random Blood Glucose; T2D, Type 2 Diabetes Mellitus; OSA, Obstructive Sleep Apnea; PCOS, Polycystic Ovarian Syndrome; N/A, Not Available
